# Supplementary material for: Chemical vapor deposition of hexagonal boron nitride on germanium from borazine
Source: Royal Society of Chemistry journal article supplement (doi:10.1039/d4ra03704a), 2024-01-01
Supplement: d4ra03704a1.pdf [file d4ra03704a1.pdf]

Supplementary information for:

## Chemical Vapor Deposition of Hexagonal Boron

## Nitride on Germanium from Borazine

Katherine A. Su<sup>a</sup>, Songying Li<sup>a</sup>, Wei-Chen Wen<sup>b</sup>, Yuji Yamamoto<sup>b</sup>,  
Michael S. Arnold<sup>a\*</sup>

<sup>a</sup> Department of Materials Science and Engineering, University of Wisconsin-Madison,  
Madison, Wisconsin 53706, United States

<sup>b</sup> IHP-Leibniz-Institut für Innovative Mikroelektronik, Im Technologiepark 25, 15236  
Frankfurt (Oder), Germany

\*Email: michael.arnold@wisc.edu

### Supplementary Note 1: Borazine purification via freeze-pump-thaw

Prior to growth, borazine is purified via freeze-pump-thaw cycles. First, ~5 mL of borazine (contained in a Pyrex tube attached to our CVD system) is frozen via submersion into a liquid nitrogen dewar for 5 minutes. To remove hydrogen and residual gases, the borazine is purged with 100 sccm of Ar for 5 minutes and then evacuated with no Ar flow for 5 minutes with a dry scroll pump, reaching a pressure of approximately  $9 \times 10^{-3}$  torr. Then, evacuation is stopped, and the borazine is allowed to thaw by removing the liquid nitrogen dewar and submerging the Pyrex tube in room temperature water for approximately 3 minutes. This process is repeated three times before growth. Note, only a small fraction (<10%) of our Pyrex tube is filled with borazine, and the unfilled space gives borazine room to expand during thawing.

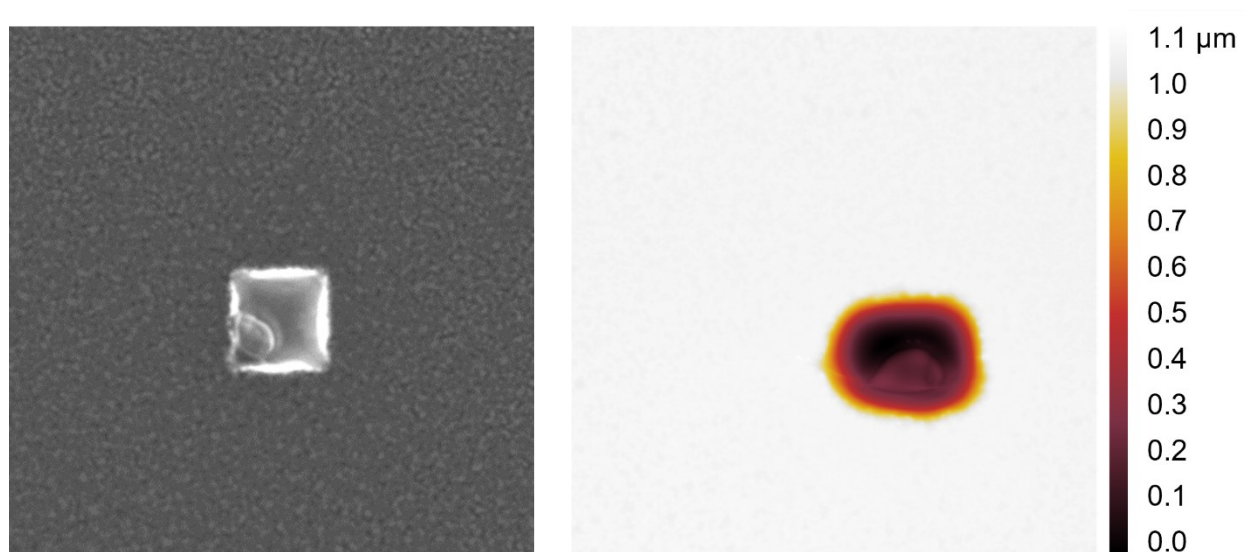

**Figure S1:** a) SEM image (20  $\mu\text{m}$  by 20  $\mu\text{m}$ ) and b) AFM height map (20  $\mu\text{m}$  by 20  $\mu\text{m}$ ) showing an etch pit in the Ge(001) surface after high-vacuum annealing in the face-up sample configuration for 30 min.

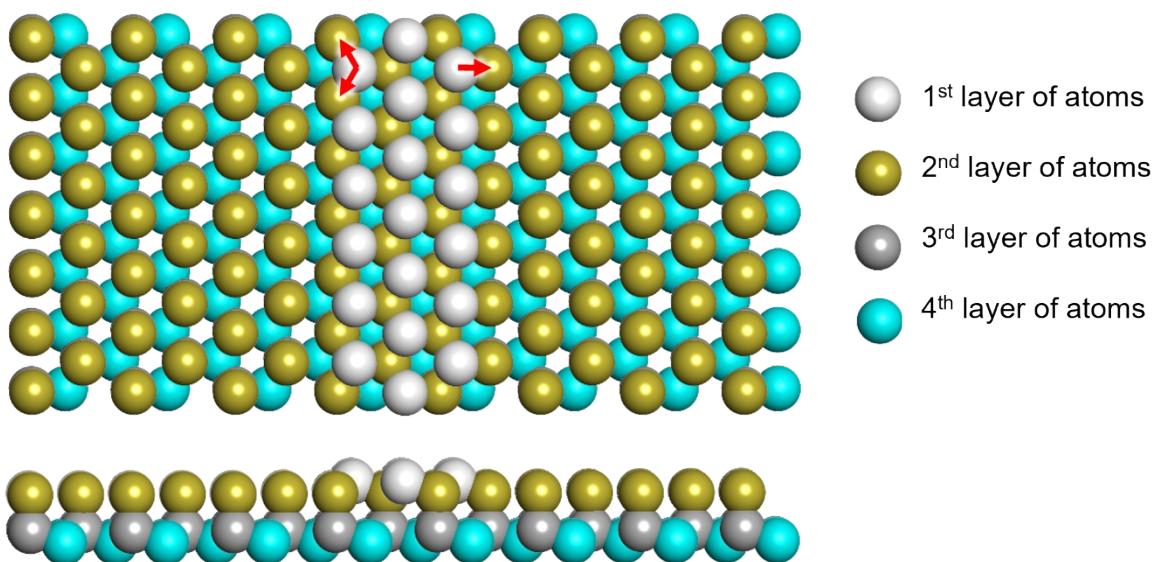

**Figure S2:** Schematic showing asymmetry of step edges on Ge(111), highlighted by red arrows.

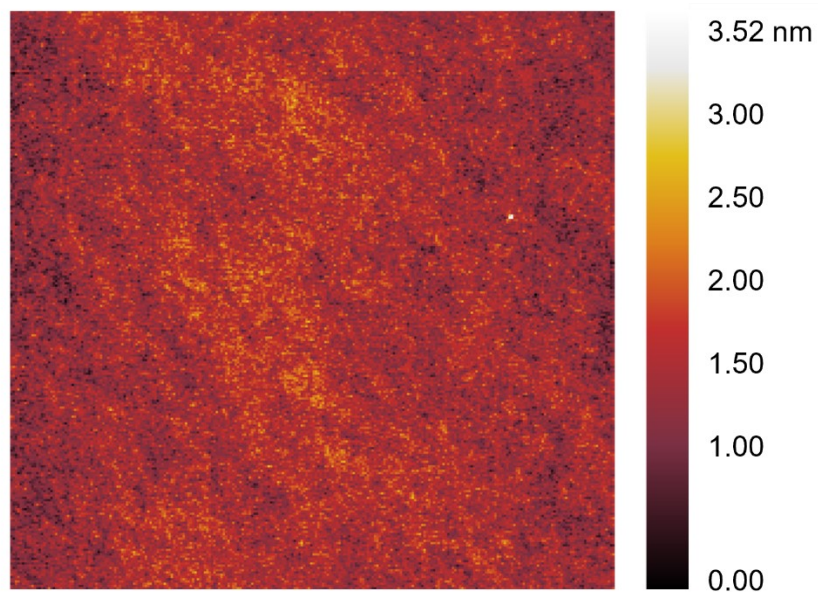

**Figure S3:** AFM scan (10 μm × 10 μm) of a bare Ge(110) substrate exposed to 0.02 M FeCl<sub>3</sub> for 1 minute, showing a lack of etch pits.

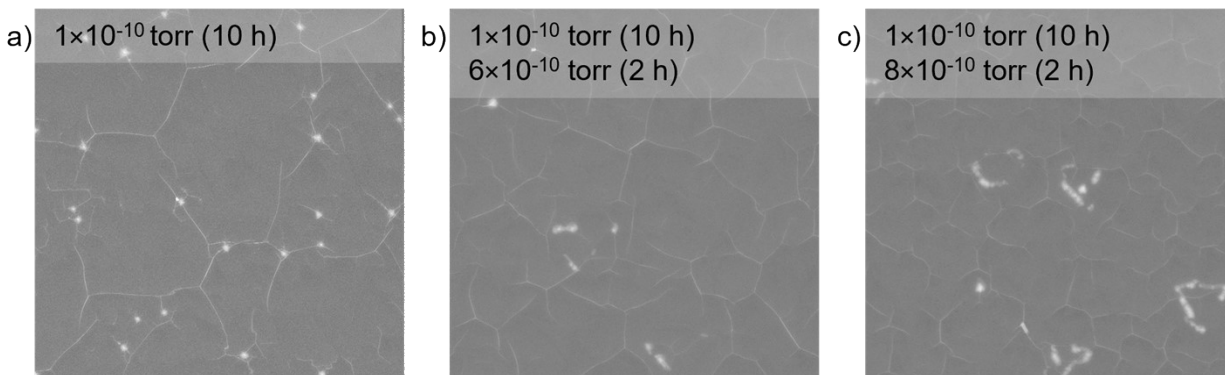

**Figure S4:** SEM images ( $10\ \mu\text{m} \times 10\ \mu\text{m}$ ) of monolayer hBN grown on Ge(110) with borazine partial pressures of a)  $1 \times 10^{-10}$  torr for 10 h, b)  $1 \times 10^{-10}$  torr for 10 h and then  $6 \times 10^{-10}$  torr for 2 h, and c)  $1 \times 10^{-10}$  torr for 10 h and then  $8 \times 10^{-10}$  torr for 2 h.

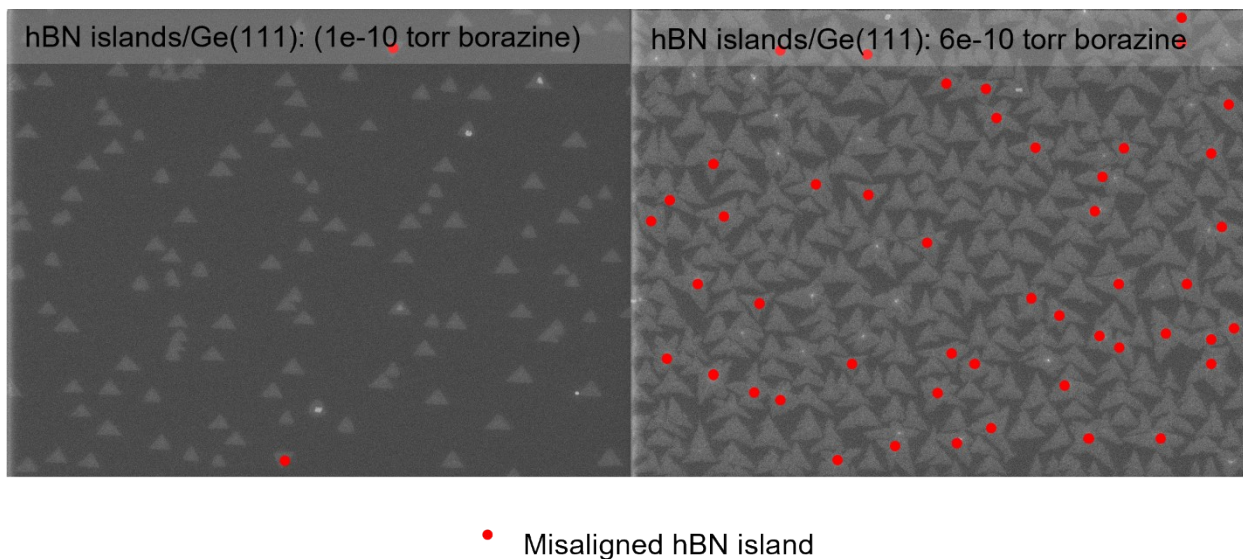

**Figure S5:** SEM images ( $11.25\ \mu\text{m} \times 8.44\ \mu\text{m}$ ) comparing hBN islands grown on Ge(111) with  $1 \times 10^{-10}$  and  $6 \times 10^{-10}$  torr for 30 minutes. Misaligned hBN islands are marked with a red dot.

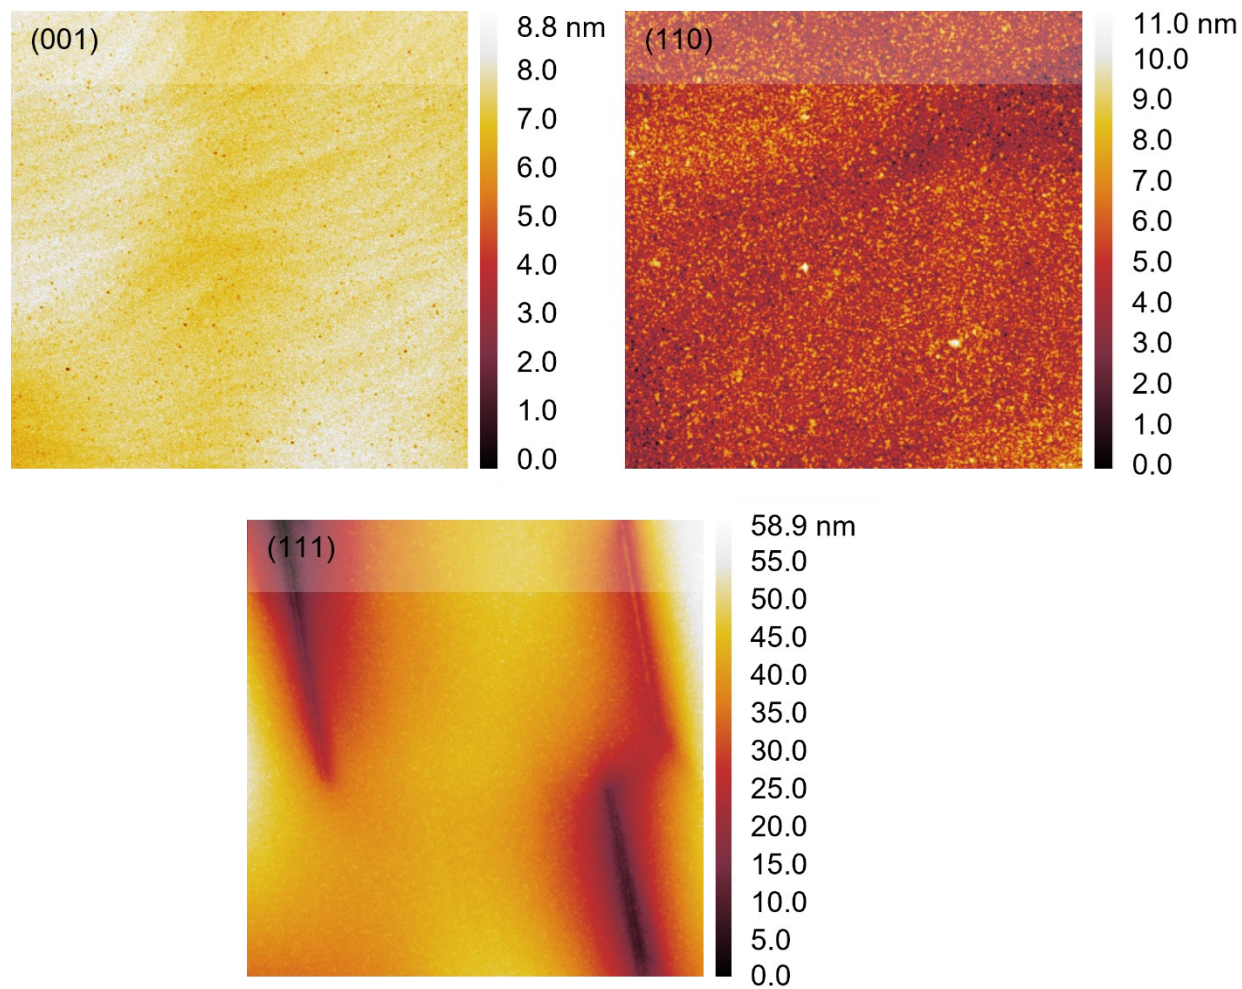

**Figure S6:** AFM scans (5 μm × 5 μm) showing initial roughness of the Ge/Si wafers.

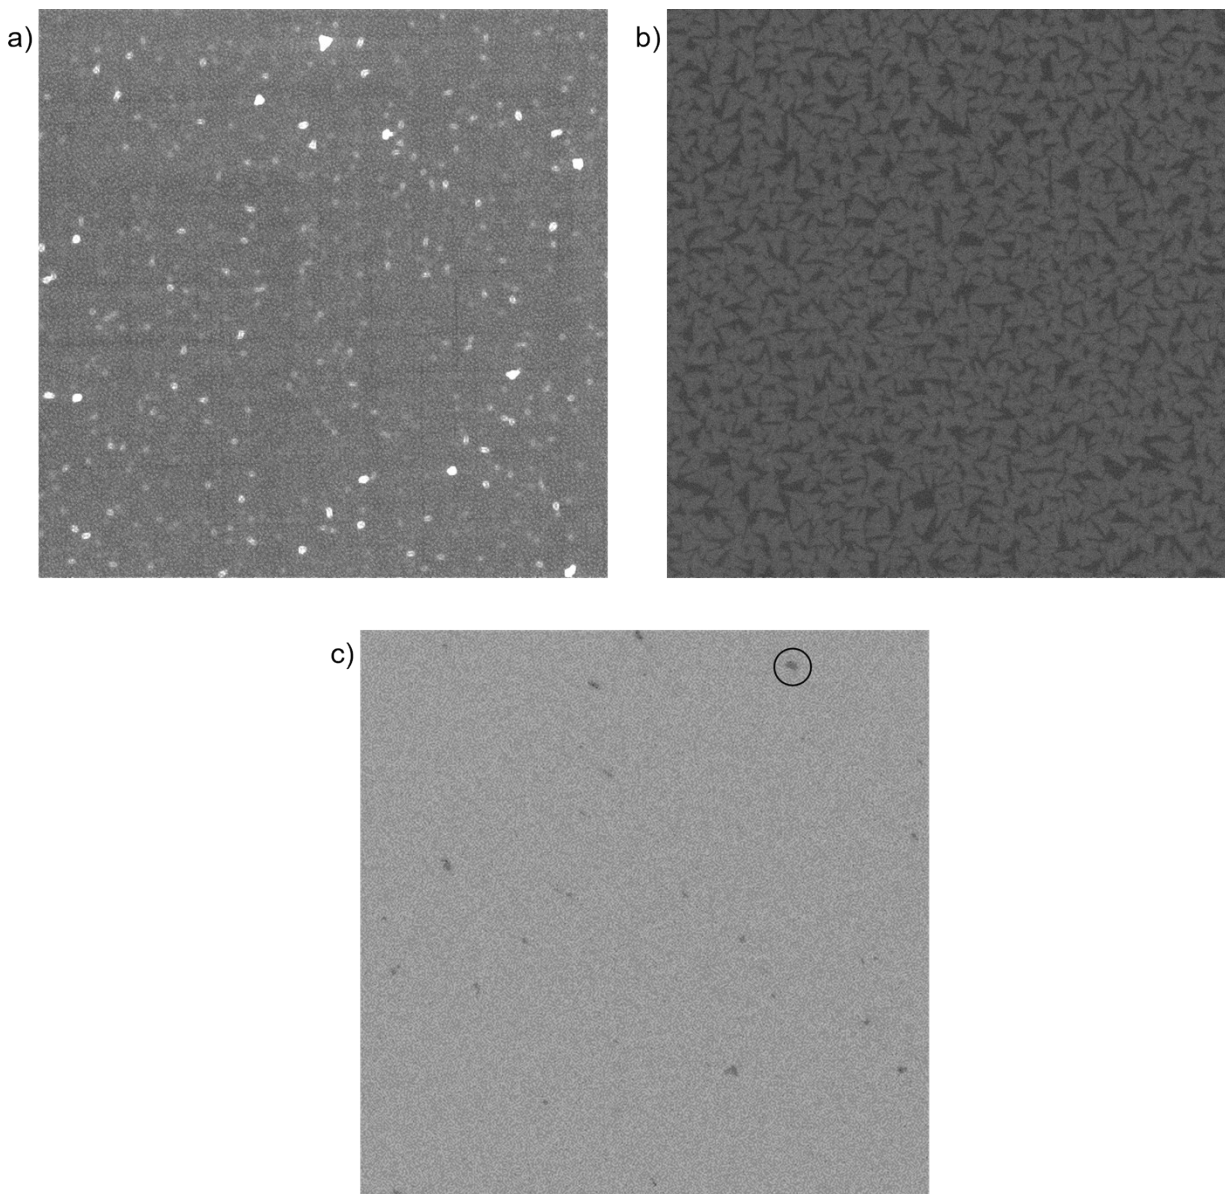

**Figure S7.** SEM images ( $10\ \mu\text{m} \times 10\ \mu\text{m}$ ) of hBN grown on Ge/Si(001) using  $6 \times 10^{-10}$  torr borazine for 30 minutes. The Ge/Si(001) substrates were annealed in Ar and  $\text{H}_2$  at  $920\ ^\circ\text{C}$  for a) 9 hours and b) the typical 45 minutes. c) SEM image ( $10\ \mu\text{m} \times 10\ \mu\text{m}$ ) of hBN grown on Ge/Si(001) using  $1 \times 10^{-10}$  torr borazine for 10 hours. The circle marks one region where the film is incomplete.
